# Supplementary material
Source: publisher figshare collection journal article supplement (https://frontiersin.figshare.com/ndownloader/files/13354889)
Supplement: Supplementary file [file 13354889]

Table S1 The sequencing results of selected *V. parahaemolyticus* isolates and NCBI blast similarity

| Isolate name | Targeted Gene | Consensus Sequence                                                                                                                                                                                                                                                                                                                                                                                                                                                                                                     | Sequence Length | Blast Similarity Results                                                                                                           |                       |
|--------------|---------------|------------------------------------------------------------------------------------------------------------------------------------------------------------------------------------------------------------------------------------------------------------------------------------------------------------------------------------------------------------------------------------------------------------------------------------------------------------------------------------------------------------------------|-----------------|------------------------------------------------------------------------------------------------------------------------------------|-----------------------|
|              |               |                                                                                                                                                                                                                                                                                                                                                                                                                                                                                                                        |                 | Hit Strain                                                                                                                         | Similarity Percentage |
| FVP26        | <i>toxR</i>   | ACGCAATCGTTGAACCAGAAGCGCCAGTAGTACCT<br>GAAAAAGCACCTGTGGCTTCTGCTGTGAATCCTTG<br>GATTCCACGCGTTATTTTATTTTGGCACTATTACTA<br>CCGATTTGCGTACTGCTGTTTACAAACCCGCGGA<br>ATCTCAGTTCCGTCAGATTGGTGAGTATCAGAACG<br>TACCAGTGATGACACCTGTAAATCACCCGCAAATC<br>AACAAC TGGTTGCCTTCTATTGAGCAGTGCAATGA<br>ACGCTACGTTAAGCACCATGCAGAAGACTCGTTAC<br>CAGTGGAAGTAATTGCCACTGGCGGACAAAATAAC<br>CAGCTGATTTTGAAC TACATTCATGACAGCAA                                                                                                                      | 349             | <i>Vibrio parahaemolyticus</i> strain ATCC 17802, (CP014046.2)                                                                     | 100%                  |
| FVP35        | <i>toxR</i>   | TTCTGCTGTGAATCCTTGGATTCCACGCGTTATTTT<br>ATTTTGGCACTATTACTACCGATTGCGTACTGCT<br>GTTTACAAACCCGCGGAATCTCAGTTCCGTCAGA<br>TTGGTGAGTATCAGAACGTACCAGTGATGACACCT<br>GTAAATCACCCGCAAATCAACAAC TGGCTGCCTTC<br>TATTGAGCAGTGCAATGAACGCTACGTTAAGCACCC<br>ATGCAGAAGACTCGTTACCAGTGGAAGTGATTGCC<br>ACTGGTGGACAAAATAACCAGCTGATTTTGAAC TA<br>CATT CATGACAGCAACCA                                                                                                                                                                          | 300             | <i>Vibrio parahaemolyticus</i> strain VP4 ToxR regulatory protein ( <i>toxR</i> ) gene, (MF983557.1)                               | 99%                   |
| FVP47        | <i>trh</i>    | TACTTCGCGATGATCTGCATCATACCTTTTCCTTCT<br>CCAGGGTCGGCTGAAC TGTATTGTTGTTAGAAAT<br>ACAACAATCAAAACTGAATCCCCGGTTAAGGCAAT<br>TGTGGAGGACTATTGGACAAACCGAAACATAAAAA<br>GAAAACCATACAAAGATGTATACGGTCAATCGGTT<br>TTCACAACAGCAGGTTCAAAGTGTTAAGCGCCTA<br>TATGACAGTAAACATCAATGGTCATAACTATACGA<br>TGGCAGCTCTTTCTGGTTATAAAGATGGTATTTCTA<br>CGGTCTTCACAAAATCAGAGAAAAACAAGCCTAAA<br>GCAAGACTATTCTCGGTAAAAATATTTTGTGATGA<br>CAACGAAGAATCAATACCAAGTGTAAC TTATTTAG<br>ATGAAACATCAGAATACTTTGTTACTGTCGAGGCA<br>TATGAGAGCGGAAATGGGCATAGTTTGTATGA | 457             | <i>Vibrio parahaemolyticus</i> strain ATCC 17802 thermostable direct hemolysin-related hemolysin ( <i>trh</i> ) gene, (GU971654.1) | 98%                   |
